# Supplementary material for: Pathology of myelinated axons in the PLP-deficient mouse model of spastic paraplegia type 2 revealed by volume imaging using focused ion beam-scanning electron microscopy
Source: PubMed Central journal article supplement — J Struct Biol. 2020 May 1;210(2):107492. doi: 10.1016/j.jsb.2020.107492 (PMC7196930; doi:10.1016/j.jsb.2020.107492), 2020-05-01
Supplement: mmc3.pdf [file mmc3.pdf]

## Supplementary Table: Axonal swellings and organelle accumulations in the inner tongue/ myelinic channels in *Plp*<sup>-Y</sup>

All swellings and accumulations are listed with the respective data set and an image showing the swelling. Data sets from HPF-prepared samples are indicated as such. The columns show the number of accumulations listed by the type (Mixed content and Mitochondria enriched). Organelle accumulations are indicated as localization: axonal or inner tongue/ myelinic channel. The number in brackets refers to the image number from the stack.

| Dataset 2018-07-27_4017        |               |                     |                                                                                      |
|--------------------------------|---------------|---------------------|--------------------------------------------------------------------------------------|
| Localisation                   | Mixed content | Mitochondria mostly | Image                                                                                |
| Axonal                         | 1 (10)        |                     | 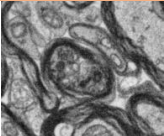   |
| Axonal                         |               | 1 (82)              |    |
| Axonal                         |               | 1 (286)             |   |
| Axonal                         |               | 1 (355)             |  |
| Inner tongue/ myelinic channel | 1(381)        |                     |  |
| Inner tongue/ myelinic channel | 1 (468)       |                     |  |
| Inner tongue/ myelinic channel | 1 (747)       |                     |  |
| Axonal                         |               | 1 (823)             |  |
| Axonal                         |               | 1 (979)             |  |
| Axonal                         | 2 (1087)      |                     |  |
| <b>Total</b>                   | <b>3</b>      | <b>5</b>            | <b>3 (Inner tongue/ myelinic channel)</b>                                            |

**Dataset 2019-08-06\_4015**

| Localisation | Mixed content | Mitochondria enriched | Image                                                                              |
|--------------|---------------|-----------------------|------------------------------------------------------------------------------------|
| Axonal       | 1 (945)       |                       | 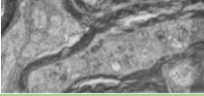 |
| <b>Total</b> | <b>1</b>      | <b>0</b>              | <b>0 (Inner tongue/ myelinic channel)</b>                                          |

**Dataset 2018-08-10\_4005**

| Localisation | Mixed content | Mitochondria enriched | Image                                                                                |
|--------------|---------------|-----------------------|--------------------------------------------------------------------------------------|
| Axonal       |               | 1 (41)                | 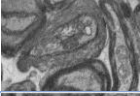   |
| Axonal       | 1 (188)       |                       |    |
| Axonal       | 1 (269)       |                       |    |
| Axonal       | 1 (326)       |                       |   |
| Axonal       | 1 (584)       |                       |  |
| Axonal       | 1 (596)       |                       |  |
| Axonal       | 1 (656)       |                       |  |
| Axonal       | 1 (717)       |                       |  |
| Axonal       | 2 (728)       |                       |  |
| Axonal       | 1 (765)       |                       |  |
| Axonal       | 2(767)        |                       |  |
| Axonal       | 1 (793)       |                       |  |

|                                |           |          |                                                                                      |  |
|--------------------------------|-----------|----------|--------------------------------------------------------------------------------------|--|
| Axonal                         | 1 (852)   |          | 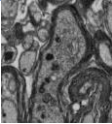   |  |
| Axonal                         | 1 (972)   |          |    |  |
| Axonal                         | 1 (1005)  |          |    |  |
| Axonal                         | 2 (1068)  |          |    |  |
| Axonal                         | 1 (1072)  |          |    |  |
| Inner tongue/ myelinic channel | 1 (1075)  |          |    |  |
| Axonal                         | 2 (1187)  |          |   |  |
| Axonal                         | 1 (1208)  |          |  |  |
| Axonal                         | 1 (1345)  |          |  |  |
| Axonal                         | 1 (1363)  |          |  |  |
| Axonal                         | 2 (1418)  |          |  |  |
| Axonal                         | 1 (1493)  |          |  |  |
| <b>Total</b>                   | <b>27</b> | <b>1</b> | <b>1 (Inner tongue/ myelinic channel)</b>                                            |  |

| Dataset 2019-06-07_4007 |               |                       |                                                                                      |
|-------------------------|---------------|-----------------------|--------------------------------------------------------------------------------------|
| Localisation            | Mixed content | Mitochondria enriched | Image                                                                                |
| Axonal                  | 1 (10)        |                       | 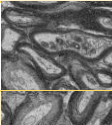 |
| Axonal                  | 1 (88)        |                       |  |

|              |           |          |                                                                                      |
|--------------|-----------|----------|--------------------------------------------------------------------------------------|
| Axonal       | 1 (251)   |          | 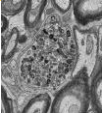   |
| Axonal       | 1 (277)   |          |    |
| Axonal       | 1 (357)   |          |    |
| Axonal       | 1 (490)   |          |    |
| Axonal       |           | 1 (628)  |    |
| Axonal       | 2 (711)   |          |    |
| Axonal       | 1 (993)   |          |   |
| Axonal       | 1 (1105)  |          |  |
| <b>Total</b> | <b>10</b> | <b>1</b> | <b>0 (Inner tongue/ myelinic channel)</b>                                            |

| Dataset 2019-06-09_4005                |                  |                       |                                                                                                                                                                            |
|----------------------------------------|------------------|-----------------------|----------------------------------------------------------------------------------------------------------------------------------------------------------------------------|
| Localisation                           | Mixed content    | Mitochondria enriched | Image                                                                                                                                                                      |
| Axonal                                 | 1 (90)           |                       | 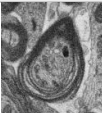                                                                                       |
| Axonal                                 | 1 (308)          |                       |                                                                                        |
| Inner tongue/ myelinic channel         | 1 (330)          |                       |                                                                                        |
| Axonal; Inner tongue/ myelinic channel | 1 (444), 1 (444) |                       |   |
| Axonal                                 | 1 (440)          |                       |                                                                                        |

|              |           |          |                                                                                      |  |
|--------------|-----------|----------|--------------------------------------------------------------------------------------|--|
| Axonal       | 1 (451)   |          | 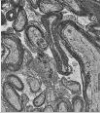   |  |
| Axonal       | 1 (475)   |          |    |  |
| Axonal       | 2(561)    |          |    |  |
| Axonal       |           | 1 (583)  |    |  |
| Axonal       |           | 1 (613)  |    |  |
| Axonal       | 1 (829)   |          |    |  |
| Axonal       | 1 (1008)  |          |    |  |
| Axonal       | 1 (1113)  |          |   |  |
| Axonal       | 1 (1121)  |          |  |  |
| Axonal       | 1 (1186)  |          |  |  |
| Axonal       | 1 (1210)  |          |  |  |
| <b>Total</b> | <b>14</b> | <b>2</b> | <b>2 (Inner tongue/ myelinic channel)</b>                                            |  |

| Dataset 2019-04-01_3655 HPF    |               |                       |                                                                                      |
|--------------------------------|---------------|-----------------------|--------------------------------------------------------------------------------------|
| Localisation                   | Mixed content | Mitochondria enriched | Image                                                                                |
| Axonal                         | 1 (82)        |                       | 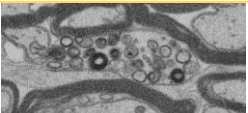 |
| Inner tongue/ myelinic channel | 1 (132)       |                       |  |

|                                |         |         |                                                                                      |  |
|--------------------------------|---------|---------|--------------------------------------------------------------------------------------|--|
| Inner tongue/ myelinic channel | 1 (267) |         | 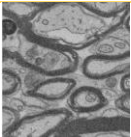   |  |
| Axonal                         | 2 (334) |         |    |  |
| Axonal                         | 1 (342) |         |    |  |
| Axonal                         | 1 (392) |         |    |  |
| Axonal                         | 1 (411) |         |    |  |
| Axonal                         | 1 (468) |         |    |  |
| Axonal                         | 1 (514) |         |   |  |
| Axonal                         |         | 1 (530) |  |  |
| Inner tongue/ myelinic channel | 1 (546) |         |  |  |
| Axonal                         |         | 1 (553) |  |  |
| Axonal                         |         | 1 (565) |  |  |
| Axonal                         | 1 (598) |         |  |  |
| Inner tongue/ myelinic channel | 1 (832) |         |  |  |
| Axonal                         | 1 (844) |         |  |  |
| Axonal                         | 1 (924) |         |  |  |
| Axonal                         | 2 (927) |         |  |  |
| Axonal                         | 1 (950) |         |  |  |

|                                |           |          |                                                                                    |  |
|--------------------------------|-----------|----------|------------------------------------------------------------------------------------|--|
| Inner tongue/ myelinic channel | 1 (1015)  |          | 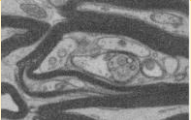 |  |
| Inner tongue/ myelinic channel | 1 (1029)  |          |  |  |
| <b>Total</b>                   | <b>14</b> | <b>3</b> | <b>6 (Inner tongue/ myelinic channel)</b>                                          |  |

| Dataset 2019-10-11_3663 HPF    |               |                       |                                                                                      |  |
|--------------------------------|---------------|-----------------------|--------------------------------------------------------------------------------------|--|
| Localisation                   | Mixed content | Mitochondria enriched | Image                                                                                |  |
| Axonal                         | 1 (1)         |                       | 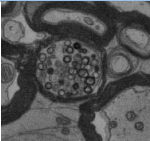   |  |
| Axonal                         | 2 (113)       |                       |    |  |
| Axonal                         |               | 1 (278)               |   |  |
| Axonal                         |               | 1 (343)               |  |  |
| Axonal                         |               | 1 (348)               |  |  |
| Axonal                         | 1 (480)       |                       |  |  |
| Inner tongue/ myelinic channel | 1 (490)       |                       |  |  |
| Axonal                         | 1 (511)       |                       |  |  |
| Axonal                         | 1 (540)       |                       |  |  |
| Axonal                         | 1 (640)       |                       |  |  |
| Axonal                         |               | 1 (653)               |  |  |

|                                        |                    |          |                                                                                                                                                                        |  |
|----------------------------------------|--------------------|----------|------------------------------------------------------------------------------------------------------------------------------------------------------------------------|--|
| Axonal                                 | 1 (681)            |          | 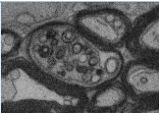                                                                                     |  |
| Axonal                                 | 1 (736)            |          |                                                                                      |  |
| Axonal                                 | 1 (793)            |          |                                                                                      |  |
| Axonal                                 | 1 (845)            |          |                                                                                      |  |
| Inner tongue/ myelinic channel         | 1 (882)            |          |                                                                                      |  |
| Axonal                                 | 1(1002)            |          |                                                                                      |  |
| Axonal                                 | 2 (1087)           |          |   |  |
| Axonal; Inner tongue/ myelinic channel | 1 (1195), 1 (1195) |          |                                                                                     |  |
| Axonal                                 | 1 (1210)           |          |                                                                                    |  |
| Inner tongue/ myelinic channel         | 1 (1487)           |          |                                                                                    |  |
| Axonal                                 | 1 (1582)           |          |                                                                                    |  |
| Inner tongue/ myelinic channel         | 1 (1618)           |          |                                                                                    |  |
| Inner tongue/ myelinic channel         | 1 (1831)           |          |                                                                                    |  |
| Axonal                                 | 1 (1854)           |          |                                                                                    |  |
| Axonal                                 | 1 (1911)           |          |                                                                                    |  |
| Axonal                                 |                    | 1 (1997) |                                                                                    |  |



|                                |           |          |                                                                                     |  |
|--------------------------------|-----------|----------|-------------------------------------------------------------------------------------|--|
| Inner tongue/ myelinic channel | 1 (2036)  |          | 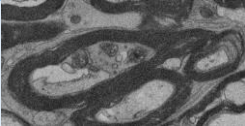  |  |
| Axonal                         |           | 1 (2049) |   |  |
| Axonal                         | 1 (2091)  |          |   |  |
| Inner tongue/ myelinic channel | 1 (2106)  |          |   |  |
| Axonal                         | 1 (2291)  |          |   |  |
| Axonal                         | 1 (2301)  |          |   |  |
| Axonal                         |           | 1 (2473) |  |  |
| <b>Total</b>                   | <b>22</b> | <b>7</b> | <b>8 (Inner tongue/ myelinic channel)</b>                                           |  |

| Dataset 2019-10-21_3669 HPF |               |                       |                                                                                      |
|-----------------------------|---------------|-----------------------|--------------------------------------------------------------------------------------|
| Localisation                | Mixed content | Mitochondria enriched | Image                                                                                |
| Axonal                      | 1 (46)        |                       | 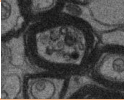 |
| Axonal                      | 1 (241)       |                       |  |
| Axonal                      | 1 (245)       |                       |  |
| Axonal                      | 1 (298)       |                       |  |
| Axonal                      | 1 (312)       |                       |  |
| Axonal                      | 1 (321)       |                       |  |
| Axonal                      | 1 (323)       |                       |  |

|                                        |                  |          |                                                                                      |  |
|----------------------------------------|------------------|----------|--------------------------------------------------------------------------------------|--|
| Axonal                                 | 1 (383)          |          |    |  |
| Axonal                                 | 1 (483)          |          |    |  |
| Axonal                                 | 1 (487)          |          |    |  |
| Axonal                                 | 1 (489)          |          |    |  |
| Inner tongue/ myelinic channel         | 2 (543)          |          |    |  |
| Axonal                                 | 1 (554)          |          |    |  |
| Inner tongue/ myelinic channel         | 1 (585)          |          |   |  |
| Axonal; Inner tongue/ myelinic channel | 1 (636), 1 (636) |          |  |  |
| Axonal                                 | 1 (815)          |          |  |  |
| Axonal                                 | 1 (826)          |          |  |  |
| Inner tongue/ myelinic channel         | 1 (958)          | 1 (958)  |  |  |
| Axonal                                 | 1 (949)          |          |  |  |
| Inner tongue/ myelinic channel         | 1 (1025)         |          |  |  |
| <b>Total</b>                           | <b>15</b>        | <b>1</b> | <b>6 (Inner tongue/ myelinic channel)</b>                                            |  |

In all datasets (152)

106

20

26 (Inner tongue/ myelinic channel)
